# Supplementary material
Source: publisher figshare collection journal article supplement (https://acs.figshare.com/ndownloader/files/3749224)
Supplement: Supplementary file 1 [file 3749224]

## **Capture and direct amplification of DNA on chitosan microparticles in a single PCR-optimal solution.**

Kunal R. Pandit\*, Imaly A. Nanayakkara†, Weidong Cao,†† Srinivasa R. Raghavan\*,†, Ian M. White†.

\*Department of Chemical & Biomolecular Engineering, University of Maryland, College Park, MD

†Fischell Department of Bioengineering, University of Maryland, College Park, MD

††Canon US Life Sciences, Inc., Rockville MD.

### **Supporting Information**

The supporting information includes product melt peaks and gels for amplicon validation, as well as PCR results investigating reasons for the shift in cycle threshold for direct PCR.

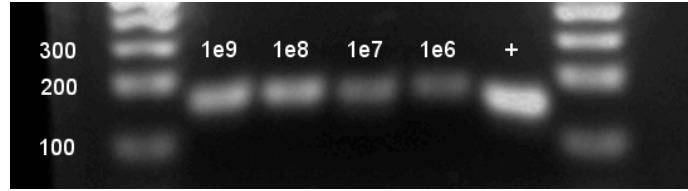

**Figure S1.** Direct PCR products run on a 1% agarose gel and stained with SYBR Green I. Copies of pUC19 captured by beads in reactions from Fig. 6 are listed above each lane; the positive control lane (+) contains product from solution-based PCR, and DNA ladders are in the first and last lanes.

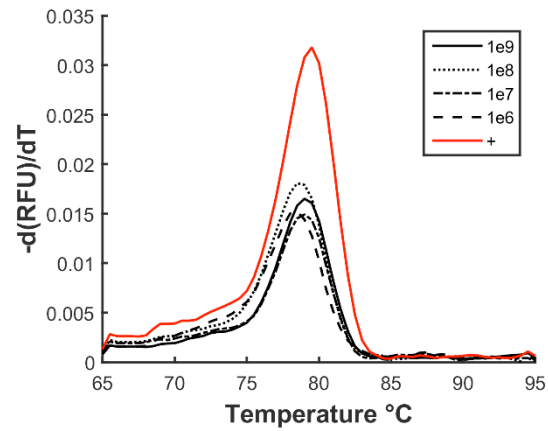

**Figure S2.** Melt curves from one calibration curve of PCR products from Fig. 6. The melt temperatures,  $79.0 \pm 0.5$  °C, of the amplicons with beads in solution ( $10^9 - 10^6$ ) match the melt temperature, 79.5 °C, of amplicons generated without beads (+).

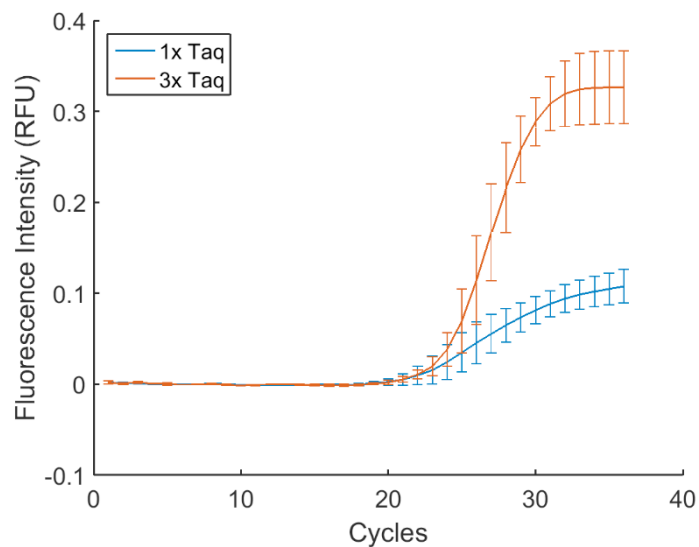

**Figure S3.** Amplification curves of  $10^6$  copies of pUC19 on chitosan beads with 1X or 3X Taq polymerase. Cycle thresholds determined for 1X and 3X polymerase were  $24.06 \pm 1.95$  and  $23.24 \pm 0.82$ , respectively. Error bars represent the standard deviation for  $n = 3$ .

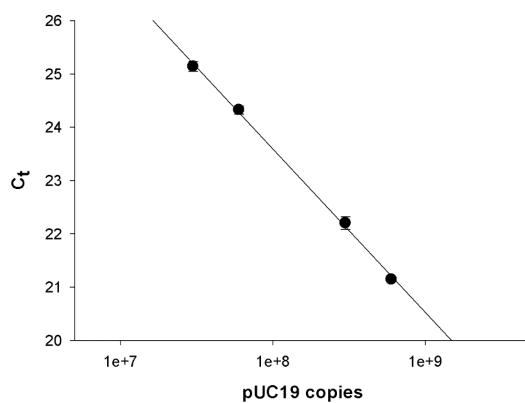

**Figure S4.** PCR calibration curve constructed from primers that had been first aspirated with chitosan microparticles before being added to the solution-based PCR reaction. The efficiency of the reaction was 112%, suggesting that minimal primers were absorbed onto the chitosan microparticles.
